# Supplementary material for: A co-transcriptional ribosome assembly checkpoint controls nascent large ribosomal subunit maturation
Source: PubMed Central journal article supplement (PMC10191850; doi:10.1038/s41594-023-00947-3), 2023-04-10
Supplement: 41594_2023_947_MOESM1_ESM.pdf [file 41594_2023_947_MOESM1_ESM.pdf]

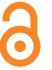

---

# A co-transcriptional ribosome assembly checkpoint controls nascent large ribosomal subunit maturation

---

In the format provided by the authors and unedited

## **Supplementary Information**

Supplementary Table 1. Molecular models of the Noc1-Noc2 RNP.

Supplementary Figure 1. Uncropped Northern blot images with densitometry analysis

## Supplementary Table 1.

| Subgroup           | Chain ID | SegID | Molecule name | Total residues or bases   | Modelled (residue range)                                                                                                     | Initial PDB template |
|--------------------|----------|-------|---------------|---------------------------|------------------------------------------------------------------------------------------------------------------------------|----------------------|
| RNA                | 1        | L1    | 25S           | 3,396                     | atomic (1-35, 51-131, 136-168, 251-280, 286-337, 378-393, 407-446, 489-705, 721-751, 778-801, 941-952, 1161-1195, 1310-1443) | 6C0F                 |
|                    | 2        | L2    | 5.8S          | 158                       | atomic (1-16, 24-96, 111-158)                                                                                                | 6C0F                 |
|                    | 3        | L3    | ITS2          | 232                       | atomic (1-67, 213-232)                                                                                                       | 6C0F                 |
| Ribosomal proteins | C        | LC    | Rpl4A_uL4     | 362                       | atomic (2-46, 110-347)                                                                                                       | 6C0F                 |
|                    | E        | LE    | Rpl6A_eL6     | 176                       | atomic (7-107, 135-176)                                                                                                      | 6C0F                 |
|                    | e        | SE    | Rpl32_eL32    | 130                       | atomic (52-129)                                                                                                              | 6C0F                 |
|                    | F        | LF    | Rpl7A_uL30    | 244                       | atomic (3-244)                                                                                                               | 6C0F                 |
|                    | f        | SF    | Rpl33A_eL33   | 107                       | atomic (4-18, 24-52, 64-107)                                                                                                 | 6C0F                 |
|                    | G        | LG    | Rpl8A_eL8     | 256                       | side-chain trimmed (53-239)                                                                                                  | 6C0F                 |
|                    | i        | SI    | Rpl36A_eL36   | 100                       | side-chain trimmed (25-100)                                                                                                  | 6C0F                 |
|                    | L        | LL    | Rpl13A_eL13   | 199                       | side-chain trimmed (52-127)                                                                                                  | 6C0F                 |
|                    | M        | LM    | Rpl14A_eL14   | 138                       | atomic (11-125)                                                                                                              | 6C0F                 |
|                    | N        | LN    | Rpl15A_eL15   | 204                       | side-chain trimmed (2-68, 96-176)                                                                                            | 6C0F                 |
|                    | O        | LO    | Rpl16A_uL13   | 199                       | atomic (3-58, 73-199)                                                                                                        | 6C0F                 |
|                    | Q        | LQ    | Rpl18A_eL18   | 186                       | atomic (15-146)                                                                                                              | 6C0F                 |
|                    | S        | LS    | Rpl20A_eL20   | 172                       | atomic (2-167)                                                                                                               | 6C0F                 |
| Assembly factors   | K        | LK    | Cic1          | 376                       | side-chain trimmed (31-51, 71-303)                                                                                           | 6C0F                 |
|                    | n        | SN    | Nop7          | 605                       | side-chain trimmed (13-43, 61-267, 351-460)                                                                                  | 6C0F                 |
|                    | o        | SO    | Nop15         | 220                       | side-chain trimmed (88-220)                                                                                                  | 6C0F                 |
|                    | t        | ST    | Rlp7          | 322                       | side-chain trimmed (54-105, 127-214, 227-322)                                                                                | 6C0F                 |
|                    | s        | SS    | Erb1          | 807                       | side-chain trimmed (239-310, 331-395)                                                                                        | 6C0F                 |
|                    | D        | LD    | Mak16         | 306                       | atomic (2-131, Zn-308)                                                                                                       | 6C0F                 |
|                    | p        | SP    | Has1          | 505                       | side-chain trimmed (42-252, 264-489)                                                                                         | 6C0F                 |
|                    | b        | SB    | Brx1          | 291                       | side-chain trimmed (31-194, 211-263)                                                                                         | 6C0F                 |
|                    | m        | SM    | Ebp2          | 427                       | side-chain trimmed (196-257)                                                                                                 | 6C0F                 |
|                    | z        | SZ    | Rrp1          | 278                       | atomic (1-186, 197-253)                                                                                                      | 6C0F                 |
|                    | 5        | L5    | Noc1          | 1025                      | atomic (213-503, 550-701, 744-795, 832-866)                                                                                  | de novo/AlphaFold    |
| 6                  | L6       | Noc2  | 710           | atomic (175-215, 220-692) | de novo/AlphaFold                                                                                                            |                      |
| Metal ions         | Y        | LY    | Magnesium     | 33                        |                                                                                                                              | 6C0F                 |

## Supplementary Table 1. Molecular models of the Noc1-Noc2 RNP.

Individual protein and RNA chains are listed with their initial PDB template (if not built *de novo*), and clustered into categories of RNA, ribosomal proteins and assembly factors.

# Supplementary Figure 1.

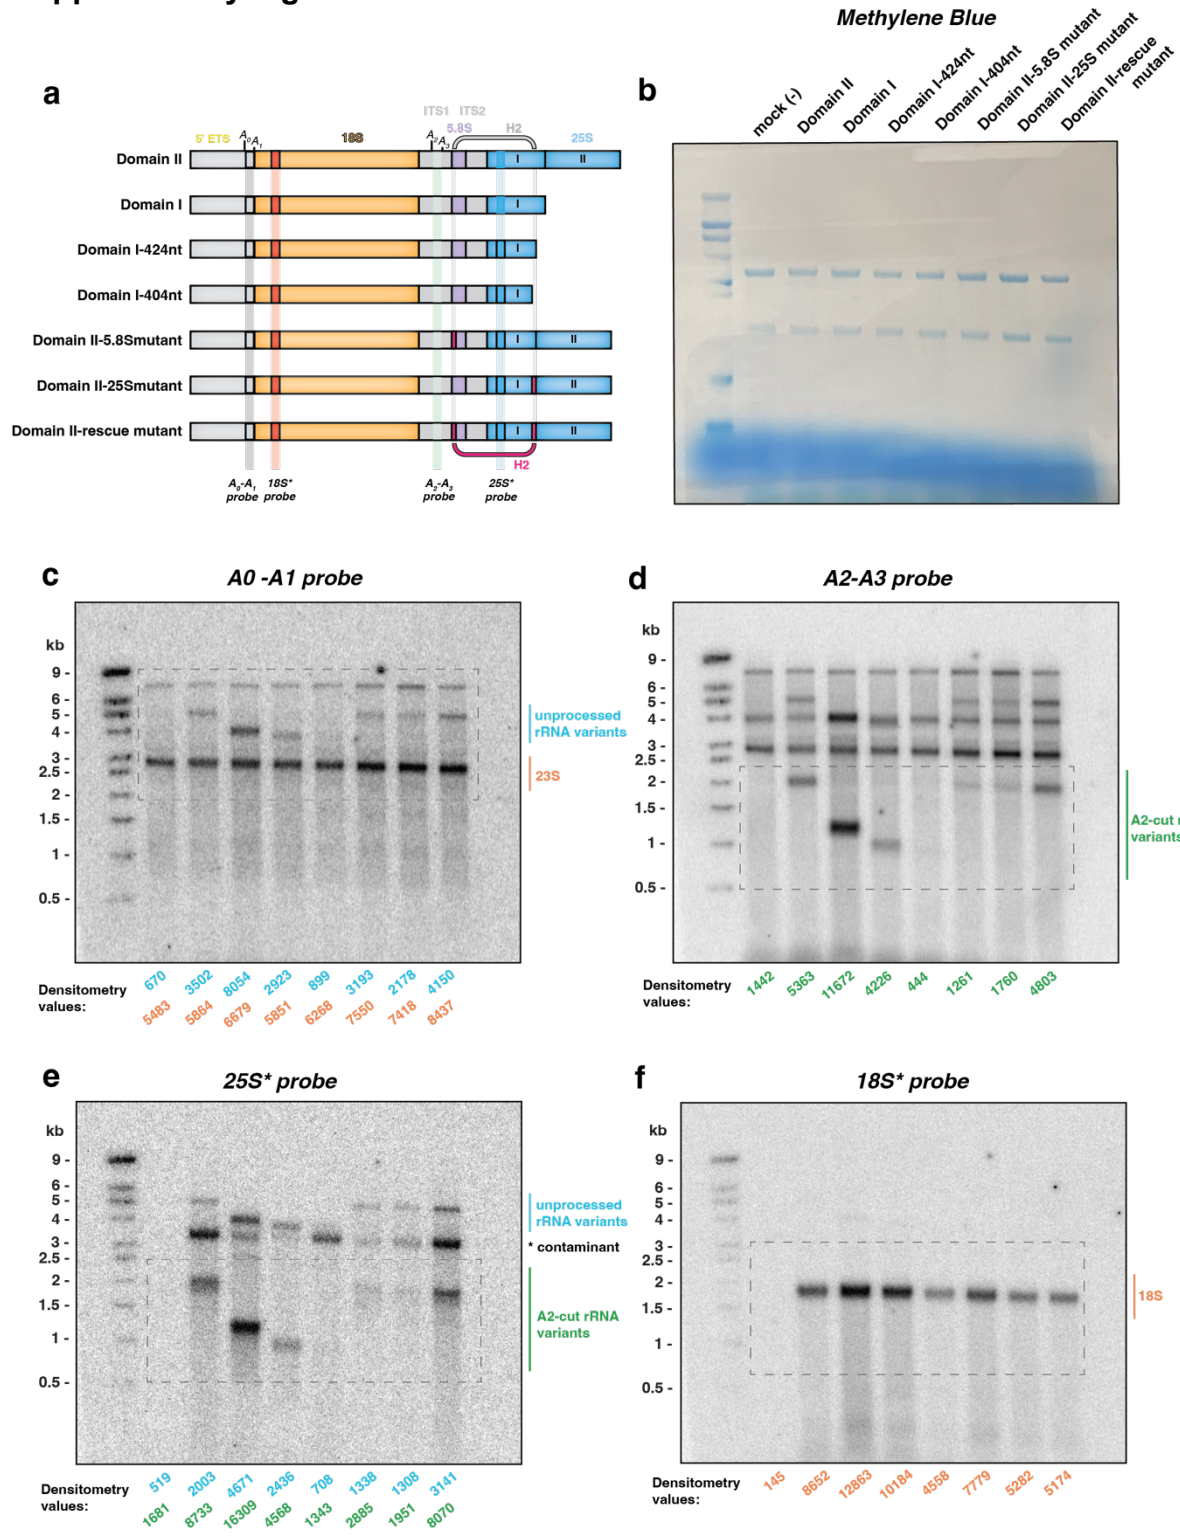

**Supplementary Figure 1. Northern blot analysis of rRNA variants emphasize significance of helix 2.**

(a) A schematic of plasmids used for the experiment, containing the entire SSU rRNA (5'ETS, 18S), plus various truncated forms of the LSU rRNA (Domain II, Domain I, Domain I-424nt and Domain I-404nt), including mutations to disrupt or rescue helix 2 formation (Domain II-5.8S mutant, Domain II-25S mutant and Domain II-rescue mutant). WT helix 2 is indicated in gray and the mutations to helix 2 are marked in magenta. The positions of the Northern blot probes used in (c-f) are indicated and color-coded on the plasmid schematic. (b) Whole cell RNA extracted from yeast cells over-expressing the above plasmids were quantified and loaded onto an RNA gel, stained with methylene blue dye (uncropped), with mock (untransformed yeast, negative control) in the first lane. (c-f) Uncropped northern blot analysis images of the transferred total extracted RNA probed with (c) A0-A1 probe, (d) A2-A3 probe, (e) 25S\* specific probe and (f) 18S\* specific probe. Northern blot experiments were repeated independently (n=2) with similar results. Dotted line boxes indicate the cropped images shown in Figure 3. Densitometry analysis of the indicated bands are color coded and numerical values are shown below each of the blots.
